# Supplementary material for: Immune response profiles of calves following vaccination with live BCG and inactivated Mycobacterium bovis vaccine candidates
Source: PLoS One. 2017 Nov 20;12(11):e0188448. doi: 10.1371/journal.pone.0188448 (PMC5695775; doi:10.1371/journal.pone.0188448)
Supplement: S1 Dataset — (A) BOVIGAM assay. OD-values for all stimulations and controls. (B) IDEXX TB ELISA. OD-values for the samples and controls as well as S/P-ratio. (C) Skin test. Skin fold thickness measurements at 0hrs, 72hrs and the difference (Δmm) in mm. Avian = PPD-A; Bovine = PPD-B; PC1 = protein cocktail 1; PC2 = protein cocktail 2. (D) Culture. Weights (g) and bacterial counts (CFU/g of PLN) of left and right PLNs. (XLSX) [file pone.0188448.s002.xlsx]

## Sheet: Table A
Time point		T-4					T-3					T-2				T-1				T0							T1					T2					T3							T4					T5
Animal ID	Group	PWM	PPD-B	PPD-A	PPD-F	NIL	PWM	PPD-B	PPD-A	PPD-F	NIL	PWM	PPD-B	PPD-A	NIL	PWM	PPD-B	PPD-A	NIL	PWM	PPD-B	PPD-A	PPD-F	ESAT-6	CFP-10	NIL	PWM	PPD-B	PPD-A	PPD-F	NIL	PWM	PPD-B	PPD-A	PPD-F	NIL	PWM	PPD-B	PPD-A	PPD-F	ESAT-6	CFP-10	NIL	PWM	PPD-B	PPD-A	PPD-F	NIL	PWM
18	Live M. bovis BCG (1)	1.141	0.123	0.204	0.076	0.065	1.785	0.456	1.005	0.086	0.132	1.714	0.555	0.865	0.091	1.538	0.77	0.849	0.091	0.851	0.549	0.603	0.101	0.06	0.055	0.053	1.603	2.194	2.062	0.587	0.18	2.223	3.18	3.071	0.784	0.076	3.074	0.936	0.866	1.862	0.104	0.174	0.138	1.454	1.637	1.407	0.193	0.096	2.47
20	Live M. bovis BCG (1)	1.059	0.164	0.436	0.058	0.067	2.022	0.333	1.82	0.066	0.095	2.596	0.509	1.152	0.049	1.003	0.508	0.907	0.072	0.452	0.119	0.174	0.054	0.052	0.052	0.048	1.494	0.52	0.604	0.286	0.297	1.812	0.651	1.065	0.194	0.066	2.111	0.372	0.457	0.18	0.141	0.136	0.148	1.057	0.604	1.275	0.122	0.105	1.194
21	Live M. bovis BCG (1)	1.223	0.461	1.006	0.122	0.081	1.587	0.261	0.878	0.108	0.074	2.728	0.5	0.946	0.052	1.936	0.933	1.177	0.07	3.752	0.54	0.498	2.704	0.061	0.055	0.05	2.418	1.964	2.053	0.78	0.215	1.632	0.603	0.814	0.213	0.069	2.962	1.61	2.122	0.747	0.101	0.091	0.114	2.584	1.523	1.169	0.546	0.089	2.405
22	Live M. bovis BCG (1)	1.101	0.184	0.303	0.063	0.626	1.859	0.353	0.635	0.095	0.082	2.281	0.354	0.599	0.047	2.397	0.596	0.438	0.079	2.573	0.522	0.342	0.24	0.05	0.049	0.054	2.046	0.423	0.414	0.285	0.161	2.017	0.87	0.536	0.872	0.062	2.634	0.71	0.684	0.648	0.095	0.08	0.09	1.868	0.78	0.864	0.584	0.08	0.666
23	Live M. bovis BCG (1)	0.738	0.099	0.139	0.08	0.065	1.254	0.14	0.378	0.083	0.071	1.348	0.19	0.329	0.058	2.309	0.308	0.443	0.095	1.094	0.351	1.148	0.115	0.094	0.094	0.089	1.441	0.652	0.55	0.213	0.201	0.917	0.499	0.638	0.102	0.065	1.514	0.485	0.439	0.155	0.098	0.102	0.101	0.999	0.678	0.592	0.137	0.087	1.001
31	Live M. bovis BCG (1)	0.618	0.237	0.254	0.161	0.216	1.179	0.175	0.189	0.119	0.086	2.614	0.695	1.069	0.069	3.769	2.86	3.615	0.091	1.074	0.318	0.368	0.25	0.05	0.054	0.05	2.248	1.46	1.465	0.541	0.107	1.247	0.511	0.515	0.315	0.086	2.039	1.377	2.186	0.486	0.09	0.092	0.088	1.524	1.973	1.537	0.445	0.149	2.048
2	Formalin inactivated M. bovis BCG (2)	2.236	0.178	0.333	0.121	0.073	2.491	0.116	0.179	3.232	0.103	1.548	0.206	0.311	0.063	2.838	0.675	0.767	0.083	1.197	0.088	0.115	0.088	0.07	0.099	0.065	1.532	0.588	0.407	0.286	0.215	1.083	0.154	0.146	0.079	0.112	1.697	0.502	0.524	0.191	0.09	0.092	0.1	1.222	0.573	0.47	0.242	0.113	1.455
4	Formalin inactivated M. bovis BCG (2)	2.817	0.364	0.544	0.107	0.11	1.654	0.19	0.286	2.089	0.101	1.398	0.357	0.339	0.062	1.164	0.415	0.412	0.076	0.683	0.232	0.336	0.058	0.115	0.053	0.1	0.234	0.218	0.205	0.229	0.192	0.101	0.073	0.1	0.054	0.085	0.176	0.108	0.106	0.094	0.097	0.1	0.106	0.173	0.11	0.113	0.107	0.112	0.18
6	Formalin inactivated M. bovis BCG (2)	1.521	0.262	0.532	0.109	0.11	1.397	0.252	0.328	1.917	0.068	0.838	0.492	0.457	0.112	0.602	0.439	0.357	0.081	1.387	1.063	2.634	0.148	0.081	0.081	0.103	1.285	1.046	1.097	0.254	0.191	0.83	0.477	0.643	0.106	0.068	0.909	0.477	0.576	0.107	0.083	0.082	0.086	1.234	0.661	0.561	0.164	0.099	0.735
7	Formalin inactivated M. bovis BCG (2)	2.873	0.3	0.56	0.119	0.092	1.66	0.323	0.451	2.411	0.097	1.527	0.495	0.542	0.063	1.359	0.271	0.336	0.105	0.963	0.125	0.157	0.065	0.057	0.074	0.058	3.966	1.193	0.807	0.21	0.086	2.569	0.448	0.456	0.142	0.157	2.365	0.471	0.47	0.192	0.143	0.15	0.121	2.601	0.302	0.313	0.159	0.102	2.064
16	Formalin inactivated M. bovis BCG (2)	0.692	0.118	0.095	0.072	0.099	2.403	0.146	0.228	0.077	0.094	2.518	0.274	0.464	0.116	1.399	0.208	0.306	0.079	0.984	0.206	0.312	0.162	0.063	0.046	0.044	2.508	0.531	1.067	0.4	0.331	1.74	0.285	0.209	0.228	0.128	0.913	0.218	0.307	0.192	0.154	0.171	0.14	1.945	0.423	0.364	0.145	0.108	1.833
29	Formalin inactivated M. bovis BCG (2)	0.869	0.238	0.46	0.063	0.149	0.97	0.303	0.42	0.124	0.083	1.927	0.343	1.275	0.052	1.396	0.294	0.494	0.07	0.995	0.232	0.489	0.053	0.051	0.055	0.076	3.358	0.574	1.271	0.202	0.14	3.795	0.582	1.386	0.133	0.108	2.709	0.35	0.41	0.11	0.1	0.078	0.086	1.725	0.617	0.935	0.14	0.148	2.014
8	Heat-killed M. bovis (3)	1.864	0.165	0.206	0.081	0.074	1.484	0.279	0.622	1.667	0.07	1.993	0.995	1.71	0.078	2.457	0.54	1.002	0.148	1.361	0.186	0.302	0.091	0.086	0.076	0.073	OVERFLOW	2.789	3.932	1.333	0.225	2.588	1.189	2.489	0.487	0.125	3.179	1.626	2.537	0.55	0.177	0.183	0.191	3.552	2.627	2.558	1.214	0.141	2.02
9	Heat-killed M. bovis (3)	1.985	0.245	0.555	0.099	0.092	0.951	0.544	1.572	1.289	0.071	0.724	0.178	0.194	0.063	0.485	0.171	0.376	0.094	1.601	0.165	0.415	0.066	0.057	0.053	0.058	1.724	2.189	1.356	0.495	0.219	1.041	0.46	0.721	0.111	0.065	1.07	0.911	0.703	0.237	0.107	0.092	0.096	2.333	3.206	1.863	0.518	0.106	1.096
10	Heat-killed M. bovis (3)	1.654	0.337	0.673	0.169	0.064	1.53	0.438	0.895	1.918	0.07	1.098	0.887	1.024	0.07	3.245	1.366	2.046	0.122	0.721	0.363	1.053	0.177	0.058	0.055	0.054	3.345	3.906	4.5	2.462	0.174	1.434	3.12	3.505	1.618	0.065	3.894	3.995	4.021	1.655	0.093	0.268	0.092	3.556	4.5	3.63	0.911	0.088	2.046
11	Heat-killed M. bovis (3)	2.251	0.234	0.338	0.125	0.09	2.847	0.706	1.137	2.614	0.107	2.056	1.595	1.552	0.056	2.636	1.297	1.413	0.078	1.854	0.41	0.737	0.167	0.057	0.056	0.056	OVERFLOW	OVERFLOW	3.242	2.445	0.069	3.03	3.073	2.476	1.354	0.13	3.927	3.987	4.006	1.816	0.092	0.305	0.089	3.446	4.5	2.135	3.703	0.118	2.089
26	Heat-killed M. bovis (3)	1.237	0.38	0.588	0.09	0.074	1.737	0.357	0.753	0.11	0.072	0.763	0.109	0.109	0.051	1.324	0.715	0.91	0.075	0.902	0.413	0.867	0.094	0.043	0.055	0.048	2.354	3.527	3.586	1.92	0.132	0.498	2.553	1.519	0.892	0.08	2.806	3.168	3.486	1.255	0.189	0.557	0.095	1.562	3.695	1.898	0.708	0.242	1.607
28	Heat-killed M. bovis (3)	1.597	0.256	0.333	0.066	0.117	1.775	0.464	1.2	0.074	0.07	1.432	0.478	1.9	0.051	1.487	0.358	1.071	0.074	0.754	0.129	0.277	0.043	0.045	0.051	0.052	1.923	1.983	1.487	0.513	0.122	0.753	2.113	0.529	1.055	0.07	0.947	2.078	0.919	0.207	0.151	0.294	0.08	0.892	2.683	0.719	0.138	0.271	0.138
12	Control (4)	0.941	0.1	0.14	0.078	0.07	1.197	0.163	0.221	0.065	0.124	0.293	0.09	0.087	0.051	1.127	0.332	0.461	0.223	0.881	0.251	0.378	0.112	0.066	0.069	0.072	1.122	0.203	0.201	0.208	0.178	1.211	0.244	0.249	0.095	0.063	0.866	0.272	0.247	0.122	0.177	0.115	0.113	0.952	0.308	0.454	0.123	0.101	0.67
13	Control (4)	2.478	0.281	0.313	0.365	0.241	1.95	0.283	0.844	0.094	0.073	0.98	0.377	0.347	0.06	2.232	0.458	0.296	0.121	0.909	0.968	0.695	0.095	0.054	0.052	0.054	3.948	2.394	2.076	0.703	0.16	1.4	0.654	0.638	0.067	0.057	3.982	1.413	1.593	0.627	0.096	0.101	0.122	2.443	0.57	0.632	0.266	0.097	3.011
14	Control (4)	1.39	0.335	0.377	0.131	0.147	1.758	0.555	1.627	0.158	0.09	0.9	0.423	1.015	0.06	1.289	0.422	0.576	0.104	0.623	0.201	0.308	0.055	0.059	0.053	0.051	1.258	0.761	1.785	0.199	0.167	0.718	0.364	0.987	0.092	0.067	1.012	0.37	0.923	0.106	0.088	0.092	0.097	2.239	0.631	1.25	0.123	0.095	1.626
15	Control (4)	1.107	0.233	0.399	0.129	0.084	1.232	0.203	0.426	0.087	0.093	0.495	0.094	0.14	0.077	0.688	0.156	0.165	0.071	0.909	0.327	0.394	0.103	0.07	0.07	0.086	2.146	0.893	1.056	0.241	0.178	1.727	0.171	0.187	0.078	0.068	1.001	0.33	0.711	0.102	0.102	0.103	0.106	0.573	0.201	0.222	0.092	0.104	0.81
24	Control (4)	2.049	0.207	0.338	0.066	0.06	1.885	0.438	0.788	0.109	0.083	2.055	0.509	0.464	0.05	1.308	0.382	0.348	0.064	0.824	0.393	0.488	0.056	0.06	0.053	0.05	OVERFLOW	0.632	1.137	1.165	0.13	1.593	0.433	0.223	0.075	0.073	3.118	0.29	0.433	0.182	0.088	0.105	0.092	3.164	0.59	0.636	0.647	0.174	3.92
25	Control (4)	1.379	0.094	0.122	0.074	0.063	1.868	0.509	1.571	0.086	0.074	0.829	0.493	0.913	0.089	1.798	0.476	0.959	0.098	1.683	0.369	1.186	0.1	0.055	0.055	0.056	2.684	0.327	0.673	0.203	0.145	1.196	0.764	0.521	0.203	0.079	1.51	0.191	0.498	0.106	0.097	0.101	0.098	1.342	0.314	0.635	0.146	0.174	1.84
[truncated: 36 more columns]

## Sheet: Table B
Time point		T-1				T0				T1				T2				T3				T4				T5				T6				T7				T8				T9				T10
Animal ID	Group	Sample	Positive control	Negative control	S/P Ratio	Sample	Positive control	Negative control	S/P Ratio	Sample	Positive control	Negative control	S/P Ratio	Sample	Positive control	Negative control	S/P Ratio	Sample	Positive control	Negative control	S/P Ratio	Sample	Positive control	Negative control	S/P Ratio	Sample	Positive control	Negative control	S/P Ratio	Sample	Positive control	Negative control	S/P Ratio	Sample	Positive control	Negative control	S/P Ratio	Sample	Positive control	Negative control	S/P Ratio	Sample	Positive control	Negative control	S/P Ratio	Sample	Positive control	Negative control	S/P Ratio
18	Live M. bovis BCG (1)	0.089	1.224	0.1545	-0.0612436	0.057	0.6645	0.071	-0.0235889	0.062	0.6645	0.071	-0.0151643	0.064	0.6645	0.071	-0.0117944	0.066	0.6645	0.071	-0.0084246	0.07	0.851	0.0805	-0.0136275	0.062	0.851	0.0805	-0.0240104	0.056	0.851	0.0805	-0.0317975	0.057	0.851	0.0805	-0.0304997	0.043	0.4755	0.059	-0.0384154	0.054	0.4755	0.059	-0.0120048	0.353	0.4755	0.059	0.705882
20	Live M. bovis BCG (1)	0.064	1.224	0.1545	-0.084619	0.06	0.6645	0.071	-0.0185341	0.057	0.6645	0.071	-0.0235889	0.059	0.6645	0.071	-0.020219	0.057	0.6645	0.071	-0.0235889	0.063	0.851	0.0805	-0.0227125	0.045	0.851	0.0805	-0.046074	0.063	0.851	0.0805	-0.0227125	0.051	0.851	0.0805	-0.0382868	0.05	0.4755	0.059	-0.0216086	0.049	0.4755	0.059	-0.0240096	0.098	0.4755	0.059	0.0936375
21	Live M. bovis BCG (1)	0.096	1.224	0.1545	-0.0546985	0.055	0.6645	0.071	-0.0269587	0.078	0.6645	0.071	0.0117944	0.142	0.6645	0.071	0.119629	0.09	0.6645	0.071	0.0320135	0.067	0.851	0.0805	-0.0175211	0.071	0.851	0.0805	-0.0123297	0.055	0.851	0.0805	-0.0330954	0.054	0.851	0.0805	-0.0343933	0.052	0.4755	0.059	-0.0168067	0.054	0.4755	0.059	-0.0120048	0.275	0.4755	0.059	0.518607
22	Live M. bovis BCG (1)	0.076	1.224	0.1545	-0.0733988	0.072	0.6645	0.071	0.00168492	0.059	0.6645	0.071	-0.020219	0.071	0.6645	0.071	0	0.082	0.6645	0.071	0.0185341	0.061	0.851	0.0805	-0.0253082	0.07	0.851	0.0805	-0.0136275	0.053	0.851	0.0805	-0.0356911	0.069	0.4755	0.059	0.0240096	0.055	0.4755	0.059	-0.00960384	0.063	0.4755	0.059	0.00960384	0.1	0.4755	0.059	0.0984394
23	Live M. bovis BCG (1)	0.052	1.224	0.1545	-0.0958392	0.054	0.6645	0.071	-0.0286436	0.061	0.6645	0.071	-0.0168492	0.045	0.6645	0.071	-0.0438079	0.043	0.6645	0.071	-0.0471778	0.06	0.851	0.0805	-0.0266061	0.077	0.851	0.0805	-0.0045425	0.057	0.851	0.0805	-0.0304997	0.056	0.4755	0.059	-0.00720288	0.047	0.4755	0.059	-0.0288115	0.048	0.4755	0.059	-0.0264106	0.167	0.4755	0.059	0.259304
31	Live M. bovis BCG (1)	0.085	1.224	0.1545	-0.0649836	0.055	0.6645	0.071	-0.0269587	0.067	0.6645	0.071	-0.00673968	0.057	0.6645	0.071	-0.0235889	0.062	0.851	0.0805	-0.0240104	0.062	0.851	0.0805	-0.0240104	0.063	0.851	0.0805	-0.0227125	0.056	0.851	0.0805	-0.0317975	0.054	0.4755	0.059	-0.0120048	0.05	0.4755	0.059	-0.0216086	0.051	0.4755	0.059	-0.0192077	0.144	0.4755	0.059	0.204082
2	Formalin inactivated M. bovis BCG (2)	0.068	1.224	0.1545	-0.0808789	0.064	0.6645	0.071	-0.0117944	0.056	0.6645	0.071	-0.0252738	0.05	0.6645	0.071	-0.0353833	0.049	0.851	0.0805	-0.0408825	0.047	0.851	0.0805	-0.0434783	0.05	0.851	0.0805	-0.0395847	0.052	0.851	0.0805	-0.036989	0.054	0.851	0.0805	-0.0343933	0.046	0.4755	0.059	-0.0312125	0.046	0.4755	0.059	-0.0312125	0.109	0.4755	0.059	0.120048
4	Formalin inactivated M. bovis BCG (2)	0.138	1.224	0.1545	-0.0154278	0.066	0.6645	0.071	-0.0084246	0.059	0.6645	0.071	-0.020219	0.069	0.6645	0.071	-0.00336984	0.073	0.851	0.0805	-0.00973394	0.073	0.851	0.0805	-0.00973394	0.071	0.851	0.0805	-0.0123297	0.069	0.851	0.0805	-0.0149254	0.065	0.851	0.0805	-0.0201168	0.062	0.4755	0.059	0.00720288	0.055	0.4755	0.059	-0.00960384	0.121	0.4755	0.059	0.14886
6	Formalin inactivated M. bovis BCG (2)	0.111	1.224	0.1545	-0.0406732	0.059	0.6645	0.071	-0.020219	0.063	0.6645	0.071	-0.0134794	0.051	0.6645	0.071	-0.0336984	0.065	0.851	0.0805	-0.0201168	0.051	0.851	0.0805	-0.0382868	0.058	0.851	0.0805	-0.0292018	0.057	0.851	0.0805	-0.0304997	0.06	0.851	0.0805	-0.0266061	0.059	0.4755	0.059	0	0.056	0.4755	0.059	-0.00720288	0.059	0.4755	0.059	0
7	Formalin inactivated M. bovis BCG (2)	0.085	1.224	0.1545	-0.0649836	0.049	0.6645	0.071	-0.0370682	0.071	0.6645	0.071	0	0.07	0.6645	0.071	-0.00168492	0.051	0.851	0.0805	-0.0382868	0.053	0.851	0.0805	-0.0356911	0.056	0.851	0.0805	-0.0317975	0.054	0.851	0.0805	-0.0343933	0.051	0.851	0.0805	-0.0382868	0.059	0.4755	0.059	0	0.053	0.4755	0.059	-0.0144058	0.057	0.4755	0.059	-0.00480192
16	Formalin inactivated M. bovis BCG (2)	0.071	1.224	0.1545	-0.0780739	0.056	0.6645	0.071	-0.0252738	0.053	0.6645	0.071	-0.0303286	0.052	0.6645	0.071	-0.0320135	0.056	0.851	0.0805	-0.0317975	0.055	0.851	0.0805	-0.0330954	0.058	0.851	0.0805	-0.0292018	0.058	0.851	0.0805	-0.0292018	0.05	0.4755	0.059	-0.0216086	0.051	0.4755	0.059	-0.0192077	0.053	0.4755	0.059	-0.0144058	0.075	0.4755	0.059	0.0384154
29	Formalin inactivated M. bovis BCG (2)	0.062	1.224	0.1545	-0.086489	0.062	0.6645	0.071	-0.0151643	0.139	0.6645	0.071	0.114575	0.135	0.6645	0.071	0.107835	0.168	0.851	0.0805	0.113563	0.145	0.851	0.0805	0.0837119	0.127	0.851	0.0805	0.0603504	0.13	0.851	0.0805	0.064244	0.065	0.4755	0.059	0.0144058	0.06	0.4755	0.059	0.00240096	0.063	0.4755	0.059	0.00960384	0.101	0.4755	0.059	0.10084
8	Heat-killed M. bovis (3)	0.091	1.224	0.1545	-0.0593735	0.059	0.6645	0.071	-0.020219	0.078	0.6645	0.071	0.0117944	0.595	0.6645	0.071	0.882898	2.248	0.6645	0.071	3.66807	3.685	0.851	0.0805	4.67813	4.5	0.851	0.0805	5.73589	4.5	0.851	0.0805	5.73589	4.5	0.851	0.0805	5.73589	3.738	0.4755	0.059	8.83313	3.911	0.4755	0.059	9.2485	4.5	0.4755	0.059	10.6627
9	Heat-killed M. bovis (3)	0.069	1.224	0.1545	-0.0799439	0.05	0.6645	0.071	-0.0353833	0.073	0.6645	0.071	0.00336984	0.057	0.6645	0.071	-0.0235889	0.043	0.6645	0.071	-0.0471778	2.507	0.851	0.0805	3.14925	3.74	0.851	0.0805	4.74951	3.229	0.851	0.0805	4.08631	3.148	0.851	0.0805	3.98118	2.768	0.4755	0.059	6.5042	3.303	0.4755	0.059	7.78872	4.5	0.4755	0.059	10.6627
10	Heat-killed M. bovis (3)	0.077	1.224	0.1545	-0.0724638	0.055	0.6645	0.071	-0.0269587	0.059	0.6645	0.071	-0.020219	0.114	0.6645	0.071	0.0724516	1.682	0.6645	0.071	2.71441	4.071	0.851	0.0805	5.1791	3.927	0.851	0.0805	4.99221	3.685	0.851	0.0805	4.67813	3.724	0.851	0.0805	4.72875	3.749	0.4755	0.059	8.85954	3.766	0.4755	0.059	8.90036	4.5	0.4755	0.059	10.6627
11	Heat-killed M. bovis (3)	0.076	1.224	0.1545	-0.0733988	0.057	0.6645	0.071	-0.0235889	0.063	0.6645	0.071	-0.0134794	0.301	0.6645	0.071	0.387532	0.66	0.6645	0.071	0.992418	3.814	0.851	0.0805	4.84555	3.972	0.851	0.0805	5.05062	3.658	0.851	0.0805	4.64309	3.638	0.851	0.0805	4.61713	3.525	0.4755	0.059	8.32173	3.396	0.4755	0.059	8.012	4.5	0.4755	0.059	10.6627
26	Heat-killed M. bovis (3)	0.106	1.224	0.1545	-0.0453483	0.085	0.6645	0.071	0.0235889	0.096	0.6645	0.071	0.042123	0.092	0.6645	0.071	0.0353833	3.765	0.851	0.0805	4.78196	4.5	0.851	0.0805	5.73589	4.5	0.851	0.0805	5.73589	4.5	0.851	0.0805	5.73589	4.5	0.4755	0.059	10.6627	4.5	0.4755	0.059	10.6627	4.5	0.4755	0.059	10.6627	4.5	0.4755	0.059	10.6627
28	Heat-killed M. bovis (3)	0.072	1.224	0.1545	-0.0771388	0.065	0.6645	0.071	-0.0101095	0.068	0.6645	0.071	-0.00505476	0.101	0.6645	0.071	0.0505476	2.51	0.851	0.0805	3.15315	3.841	0.851	0.0805	4.8806	4.048	0.851	0.0805	5.14925	3.978	0.851	0.0805	5.0584	3.914	0.4755	0.059	9.2557	3.572	0.4755	0.059	8.43457	4.5	0.4755	0.059	10.6627	4.5	0.4755	0.059	10.6627
12	Control (4)	0.084	1.224	0.1545	-0.0659187	0.068	0.6645	0.071	-0.00505476	0.063	0.6645	0.071	-0.0134794	0.053	0.6645	0.071	-0.0303286	0.058	0.6645	0.071	-0.021904	0.068	0.851	0.0805	-0.0162232	0.073	0.851	0.0805	-0.00973394	0.059	0.851	0.0805	-0.027904	0.061	0.851	0.0805	-0.0253082	0.052	0.4755	0.059	-0.0168067	0.053	0.4755	0.059	-0.0144058	0.051	0.4755	0.059	-0.0192077
13	Control (4)	0.068	1.224	0.1545	-0.0808789	0.05	0.6645	0.071	-0.0353833	0.067	0.6645	0.071	-0.00673968	0.058	0.6645	0.071	-0.021904	0.056	0.6645	0.071	-0.0252738	0.063	0.851	0.0805	-0.0227125	0.066	0.851	0.0805	-0.0188189	0.07	0.851	0.0805	-0.0136275	0.077	0.851	0.0805	-0.0045425	0.058	0.4755	0.059	-0.00240096	0.06	0.4755	0.059	0.00240096	0.059	0.4755	0.059	0
14	Control (4)	0.06	1.224	0.1545	-0.088359	0.05	0.6645	0.071	-0.0353833	0.067	0.6645	0.071	-0.00673968	0.052	0.6645	0.071	-0.0320135	0.06	0.6645	0.071	-0.0185341	0.048	0.851	0.0805	-0.0421804	0.051	0.851	0.0805	-0.0382868	0.058	0.851	0.0805	-0.0292018	0.05	0.851	0.0805	-0.0395847	0.049	0.4755	0.059	-0.0240096	0.047	0.4755	0.059	-0.0288115	0.085	0.4755	0.059	0.062425
15	Control (4)	0.064	1.224	0.1545	-0.084619	0.054	0.6645	0.071	-0.0286436	0.052	0.6645	0.071	-0.0320135	0.049	0.6645	0.071	-0.0370682	0.052	0.6645	0.071	-0.0320135	0.055	0.851	0.0805	-0.0330954	0.063	0.851	0.0805	-0.0227125	0.055	0.851	0.0805	-0.0330954	0.052	0.851	0.0805	-0.036989	0.049	0.4755	0.059	-0.0240096	0.054	0.4755	0.059	-0.0120048	0.055	0.4755	0.059	-0.00960384
24	Control (4)	0.081	1.224	0.1545	-0.0687237	0.08	0.6645	0.071	0.0151643	0.123	0.6645	0.071	0.0876158	0.116	0.6645	0.071	0.0758214	0.169	0.6645	0.071	0.165122	0.118	0.851	0.0805	0.0486697	0.075	0.851	0.0805	-0.00713822	0.102	0.851	0.0805	0.027904	0.124	0.4755	0.059	0.156062	0.099	0.4755	0.059	0.0960384	0.08	0.4755	0.059	0.0504202	0.265	0.4755	0.059	0.494598
25	Control (4)	0.129	1.224	0.1545	-0.0238429	0.059	0.6645	0.071	-0.020219	0.062	0.6645	0.071	-0.0151643	0.07	0.6645	0.071	-0.00168492	0.054	0.6645	0.071	-0.0286436	0.054	0.851	0.0805	-0.0343933	0.055	0.851	0.0805	-0.0330954	0.048	0.851	0.0805	-0.0421804	0.054	0.4755	0.059	-0.0120048	0.05	0.4755	0.059	-0.0216086	0.05	0.4755	0.059	-0.0216086	0.053	0.4755	0.059	-0.0144058
[truncated: 8 more columns]

## Sheet: Table C
Time point		T9
Animal ID	Group	Avian 0hrs	Avian 72hrs	Avian △mm	Bovine 0hrs	Bovine 72hrs	Bovine △mm	PC1 0hrs	PC1 72hrs	PC1 △mm	PC2 0hrs	PC2 72hrs	PC2 △mm	Remarks
18	Live M. bovis BCG (1)	6.3	14.7	8.4	5.8	16.3	10.5	4.9	5	0.1	4.8	5	0.2	Circumscribed reaction on avian site
20	Live M. bovis BCG (1)	5.3	10	4.7	4.9	10.1	5.2	4.4	5.1	0.7	4.1	5.4	1.3	Edema on avian site
21	Live M. bovis BCG (1)	5.9	10.9	5	5.9	11.4	5.5	5.1	5.9	0.8	5	5.5	0.5	Circumscribed reaction on avian site
22	Live M. bovis BCG (1)	6	10.8	4.8	5.6	11	5.4	5.2	5.5	0.3	4.9	5.3	0.4	Circumscribed reaction on avian site
23	Live M. bovis BCG (1)	4	9.4	5.4	3.9	9.4	5.5	3.6	3.5	-0.1	3.9	3.9	0
31	Live M. bovis BCG (1)	4.8	5.3	0.5	4.8	8.1	3.3	4.6	4.6	0	4.9	5.2	0.3	Edema on bovine site
2	Formalin inactivated M. bovis BCG (2)	4.6	9.1	4.5	4.5	8.2	3.7	4	3.9	-0.1	5.5	6	0.5	Edema on avian and bovine sites
4	Formalin inactivated M. bovis BCG (2)	5.4	8.6	3.2	5.5	5.9	0.4	4.1	4.7	0.6	5.4	5.3	-0.1
6	Formalin inactivated M. bovis BCG (2)	6.6	9.1	2.5	5.3	7.7	2.4	5.1	6.5	1.4	8.2	8.3	0.1
7	Formalin inactivated M. bovis BCG (2)	5	8.6	3.6	4.8	6.3	1.5	4.3	4.4	0.1	6	6.2	0.2
16	Formalin inactivated M. bovis BCG (2)	6.3	9.9	3.6	4.6	7.5	2.9	4.2	5.4	1.2	5.5	4.5	-1
29	Formalin inactivated M. bovis BCG (2)	4.1	7.5	3.4	4	5.8	1.8	4.1	4.5	0.4	4.9	4.8	-0.1	Edema on avian site
8	Heat-killed M. bovis (3)	5.9	10	4.1	5	14.1	9.1	4.8	6.6	1.8	5.3	5.6	0.3
9	Heat-killed M. bovis (3)	8	14.6	6.6	6.3	23.1	16.8	7.4	10.2	2.8	7.8	8.9	1.1	Circumscribed reaction on avian and bovine sites
10	Heat-killed M. bovis (3)	5.5	13	7.5	5.6	15.4	9.8	4.5	6.8	2.3	5.6	5.6	0
11	Heat-killed M. bovis (3)	5.8	9	3.2	5.6	17.9	12.3	5	8.6	3.6	5.7	8	2.3	Circumscribed reaction on avian and bovine sites
26	Heat-killed M. bovis (3)	6.5	9.5	3	6.2	8.2	2	4.4	6.4	2	5	5.5	0.5
28	Heat-killed M. bovis (3)	4.1	8.1	4	4	10.2	6.2	3.8	5.9	2.1	4	6.3	2.3	Flat reaction on avian site
12	Control (4)	6	8	2	5.4	5.5	0.1	5.3	5.2	-0.1	5.8	5.4	-0.4	Circumscribed reaction on bovine site
13	Control (4)	6.1	7.5	1.4	5.6	6	0.4	5.5	5.5	0	7.7	7	-0.7
14	Control (4)	7.2	18.6	11.4	6.6	14	7.4	5.8	6	0.2	6.2	6.7	0.5
15	Control (4)	5.8	7.4	1.6	5.4	5.7	0.3	4.5	4.5	0	4.8	5	0.2	Flat reaction on avian site
24	Control (4)	3.9	5.2	1.3	4.1	3.9	-0.2	3	3.4	0.4	3.5	3.6	0.1
25	Control (4)	6.4	8.6	2.2	4.9	5.3	0.4	4.5	4.4	-0.1	4.2	4.5	0.3

## Sheet: Table D
Time point		T12
Animal ID	Group	Left PLN weight	Right PLN Weight	Left PLN bacterial count	Right PLN bacterial count
18	Live M. bovis BCG (1)	15.86	17.753	0	6650
20	Live M. bovis BCG (1)	13.683	13.349	0	0
21	Live M. bovis BCG (1)	15.502	15.222	0	308
22	Live M. bovis BCG (1)	14.588	14.283	0	0
23	Live M. bovis BCG (1)	10.665	10.468	0	0
31	Live M. bovis BCG (1)	13.611	13.632	0	8
2	Formalin inactivated M. bovis BCG (2)	16.2	14	0	280
4	Formalin inactivated M. bovis BCG (2)	16.953	22.517	0	0
6	Formalin inactivated M. bovis BCG (2)	18.435	18.28	0	28
7	Formalin inactivated M. bovis BCG (2)	17.63	18.69	0	3402
16	Formalin inactivated M. bovis BCG (2)	10.446	9.833	0	112
29	Formalin inactivated M. bovis BCG (2)	13.61	12.56	0	1750
8	Heat-killed M. bovis (3)	21.02	15.58	0	42
9	Heat-killed M. bovis (3)	25.383	25.85	0	14
10	Heat-killed M. bovis (3)	16.975	13.868	0	140
11	Heat-killed M. bovis (3)	19.738	24.141	0	70
26	Heat-killed M. bovis (3)	17.1	16.99	0	182
28	Heat-killed M. bovis (3)	14.776	12.949	0	0
12	Control (4)	19.137	23.089	0	574
13	Control (4)	20.64	20.81	0	0
14	Control (4)	15.635	13.323	0	0
15	Control (4)	14.94	15.61	0	40
24	Control (4)	14.48	13.36	0	0
25	Control (4)	13.59	12.76	0	0
