# Supplementary material for: Immune response profiles of calves following vaccination with live BCG and inactivated Mycobacterium bovis vaccine candidates
Source: PLoS One. 2017 Nov 20;12(11):e0188448. doi: 10.1371/journal.pone.0188448 (PMC5695775; doi:10.1371/journal.pone.0188448)
Supplement: S2 Dataset — (A) Linear mixed effects models describing PPD-B and the ratios of PPD-B/PPD-A and PPD-B/PPD-F. Outcome = a + b1 * time + b2 * group + b3 * (time * group). Data were log transformed in order to meet the model assumptions of normality and homoscedasticity. Back-transformed estimates and 95% confidence intervals are given. Significant results are in bold. (B) Linear mixed effects models describing ESAT-6 and CFP-10. Outcome = a + b1 * time + b2 * group + b3 * (time * group). Data were log transformed in order to meet the model assumptions of normality and homoscedasticity. Back-transformed estimates and 95% confidence are given. Significant results are in bold. (C) Linear mixed effects model describing the S/P ratio. Outcome = a + b1 * time + b2 * group + b3 * (time * group). Data were log transformed in order to meet the model assumptions of normality and homoscedasticity. Back-transformed estimates and 95% confidence intervals are given. Significant results are in bold. (D) Double generalized linear model describing ΔPPDB—ΔPPDA in the skin test. Outcome = a + b1 * group. Estimates and 95% confidence intervals are given. Significant results are in bold. (E) A simple general linear model describing ΔPC1 and ΔPC2. Outcome = a + b1 * group. Estimates and 95% confidence intervals are given. Significant results are in bold. (F) Linear mixed effects model describing the PLN weights. Outcome = a + b1 * LN side + b2 * group + b3 * (LN side * group) + b4 * gender. Data (PLN weights) were log transformed in order to meet the model assumptions of normality and homoscedasticity. Estimates and 95% confidence intervals are given. Significant results are in bold. (G) Negative binomial generalized linear model describing the bacterial counts. Outcome = a + b1 * group. Back-transformed estimates and 95% confidence intervals are given. Significant results are in bold. (XLSX) [file pone.0188448.s003.xlsx]

## Sheet: Table A
LME Model	Outcome = a + b1 * time + b2 * group + b3 * (time * group)
Outcome variable	Vaccination group	Time point	Estimate	95% confidence interval
				Lower	Upper
PPD-B	Live BCG	T0	1.0465	0.7712	1.4202
		T1	1.2707	0.7748	2.084
		T2	1.5232	0.9287	2.498
		T3	1.5163	0.9245	2.4867
		T4	1.907	1.1628	3.1276
		T5	1.4601	0.8903	2.3946
		T6	1.4315	0.8728	2.3476
		T7	1.3702	0.8355	2.2472
		T8	1.4725	0.8979	2.4149
		T9	1.4341	0.8744	2.3519
		T10	1.2348	0.7529	2.0252
		T11	1.2686	0.7735	2.0806
	Formalin-inactivated BCG	T0	0.9587	0.7225	1.272
		T1	0.9993	0.6729	1.484
		T2	0.8957	0.6031	1.3302
		T3	0.9767	0.6577	1.4505
		T4	1.1238	0.7567	1.669
		T5	0.8787	0.5917	1.305
		T6	0.809	0.5447	1.2014
		T7	0.9987	0.6725	1.4832
		T8	0.9266	0.6239	1.3762
		T9	0.693	0.4667	1.0292
		T10	0.7139	0.4807	1.0602
		T11	0.511	0.3441	0.7589
	Heat-killed M. bovis	T0	1.1764	0.8928	1.5501
		T1	3.2197	2.1609	4.7972
		T2	2.6597	1.7851	3.963
		T3	3.423	2.2973	5.1002
		T4	4.7779	3.2067	7.119
		T5	2.8611	1.9202	4.2629
		T6	2.8943	1.9425	4.3124
		T7	4.0357	2.7085	6.0131
		T8	3.6633	2.4586	5.4583
		T9	2.8179	1.8912	4.1986
		T10	1.3371	0.8974	1.9922
		T11	1.4072	0.9445	2.0967
PPD-B / PPD-A	Live BCG	T0	0.9171	0.7554	1.1134
		T1	1.2852	0.9432	1.7512
		T2	0.9609	0.7052	1.3093
		T3	1.1899	0.8732	1.6213
		T4	1.2292	0.9021	1.6749
		T5	1.1228	0.824	1.5299
		T6	0.9184	0.674	1.2515
		T7	1.2538	0.9201	1.7084
		T8	1.1242	0.825	1.5319
		T9	0.9002	0.6606	1.2266
		T10	1.1639	0.8541	1.5859
		T11	1.1516	0.8451	1.5691
	Formalin-inactivated BCG	T0	1.0064	0.8296	1.2208
		T1	1.1219	0.8384	1.5014
		T2	0.8924	0.6668	1.1942
		T3	1.2227	0.9137	1.6363
		T4	1.2201	0.9118	1.6328
		T5	1.0253	0.7662	1.3721
		T6	0.9283	0.6937	1.2423
		T7	1.3363	0.9986	1.7882
		T8	1.0587	0.7912	1.4168
		T9	1.2155	0.9083	1.6266
		T10	1.0306	0.7702	1.3792
		T11	0.9436	0.7051	1.2627
	Heat-killed M. bovis	T0	0.8838	0.7258	1.0763
		T1	1.3854	1.007	1.9059
		T2	1.1268	0.819	1.5502
		T3	1.3812	1.004	1.9001
		T4	2.0422	1.4844	2.8095
		T5	1.4431	1.049	1.9853
		T6	1.3798	1.0029	1.8982
		T7	1.5398	1.1193	2.1184
		T8	1.5643	1.1371	2.1521
		T9	1.7461	1.2692	2.4022
		T10	1.361	0.9893	1.8724
		T11	1.2578	0.9143	1.7305
PPD-B / PPD-F	Live BCG	T0	0.9181	0.7395	1.1399
		T1	1.2246	0.8663	1.731
		T2	1.0503	0.7402	1.4904
		T3	0.9578	0.6715	1.3662
		T4	1.4759	1.0281	2.1188
		T5	1.3721	0.9485	1.985
		T6	1.5432	1.0574	2.2521
		T7	1.3109	0.8895	1.9321
		T8	1.2153	0.8157	1.8105
		T9	0.9854	0.6537	1.4853
		T10	1.1308	0.7409	1.726
		T11	1.122	0.7254	1.7354
	Formalin-inactivated BCG	T0	0.7113	0.5669	0.8924
		T1	1.1772	0.8188	1.6923
		T2	0.9321	0.6458	1.3454
		T3	1.0172	0.7009	1.4763
		T4	1.144	0.7829	1.6715
		T5	1.0108	0.6863	1.4889
		T6	1.1195	0.7531	1.6642
		T7	1.1767	0.7834	1.7673
		T8	1.1862	0.7809	1.8019
		T9	0.8819	0.5734	1.3561
		T10	1.2533	0.8044	1.9529
		T11	0.7486	0.4738	1.1828
	Heat-killed M. bovis	T0	0.7873	0.6341	0.9775
		T1	1.3997	0.9902	1.9786
		T2	1.208	0.8513	1.7141
		T3	1.6342	1.1457	2.3309
		T4	2.1891	1.5248	3.1426
		T5	1.6467	1.1383	2.3821
		T6	2.339	1.6027	3.4135
		T7	2.3286	1.58	3.432
		T8	2.4674	1.6562	3.6759
		T9	1.8609	1.2345	2.805
		T10	2.2382	1.4664	3.4162
		T11	1.1348	0.7337	1.7551
The estimates are the multiplication factor rates (ratios) for each time point compared to the mean value of the control group at the same time point: e.g. in the model describing PPD-B, the estimate for the heat-killed M. bovis group at T4 is 4.78. Thus, at T4 the mean in this group is 4.78 times (95% confidence interval 3.21-7.12) as large as the mean at T4 in the control group.

## Sheet: Table B
LME Model	Outcome = a + b1 * time + b2 * group + b3 * (time * group)
Outcome variable	Vaccination group	Time point	Estimate	95% confidence interval
				Lower	Upper
ESAT-6	Live BCG	T0	1.1092	0.7972	1.5432
		T3	0.8155	0.5862	1.1346
		T9	0.9924	0.7133	1.3806
	Formalin-inactivated BCG	T0	0.8682	0.3623	2.0804
		T3	1.1781	0.4916	2.8229
		T9	0.4757	0.1985	1.1398
	Heat-killed M. bovis	T0	1.0433	0.6944	1.5675
		T3	1.4394	0.9581	2.1625
		T9	1.4025	0.9106	2.1602
CFP-10	Live BCG	T0	1.1092	0.7972	1.542
		T3	0.8155	0.5862	1.1346
		T9	0.9924	0.7133	1.3806
	Formalin-inactivated BCG	T0	0.8682	0.3623	2.0804
		T3	1.1781	0.4916	2.8229
		T9	0.4757	0.1985	1.1398
	Heat-killed M. bovis	T0	1.0433	0.6944	1.5675
		T3	1.4394	0.9581	2.1625
		T9	1.4025	0.9106	2.1602
The estimates are the multiplication factor rates (ratios) for each time point compared to the mean value of the control group at the same time point: e.g. in the model describing CFP-10, the estimate for the heat-killed M. bovis group at T3 is 1.44. Thus, at T3 the mean in this group is 1.44 times (95% confidence interval 0.96-2.16) as large as the mean at T3 in the control group.

## Sheet: Table C
LME Model	Outcome = a + b1 * time + b2 * group + b3 * (time * group)
Outcome variable	Vaccination group	Time point	Estimate	95% confidence interval
				Lower	Upper
S/P-ratio	Live BCG	T0	0.9372	0.6	1.4722
		T1	0.9053	0.51	1.602
		T2	1.0869	0.62	1.9166
		T3	0.9465	0.54	1.673
		T4	0.9895	0.56	0.7636
		T5	1.0088	0.56	1.8232
		T6	0.8888	0.48	1.6371
		T7	0.8805	0.47	1.661
		T8	0.8094	0.42	1.5703
		T9	0.9164	0.46	1.8353
		T10	2.6504	1.28	5.4973
		T11	3.9002	1.81	8.4012
		T12	4.569	2.04	10.2455
	Formalin-inactivated BCG	T0	1.0998	0.73	1.6573
		T1	0.991	0.6	1.6403
		T2	1.0613	0.64	1.7498
		T3	0.9251	0.56	1.5293
		T4	1.0031	0.6	1.6739
		T5	1.0496	0.62	1.7791
		T6	1.0451	0.6	1.8096
		T7	0.8387	0.47	1.4911
		T8	0.9726	0.53	1.7833
		T9	0.9458	0.5	1.7951
		T10	1.1571	0.59	2.2808
		T11	1.0015	0.49	2.0557
		T12	1.6379	0.76	3.5087
	Heat-killed M. bovis	T0	1.0895	0.69	1.716
		T1	1.0476	0.59	1.8614
		T2	2.6151	1.48	4.6304
		T3	15.8564	8.93	28.1443
		T4	60.3316	33.71	107.969
		T5	68.6545	37.84	124.567
		T6	65.1417	35.23	120.455
		T7	66.8588	35.31	126.593
		T8	90.9897	46.73	177.158
		T9	99.3796	49.45	199.709
		T10	79.759	38.33	165.964
		T11	90.8686	42.06	196.335
		T12	167.048	74.28	375.679
The estimates are the multiplication factor rates (ratios) for each time point compared to the mean value of the control group at the same time point: e.g. the estimate for the heat-killed M. bovis group at T2 is 2.62. Thus, at T2 the mean in this group is 2.62 times (95% confidence interval 1.48-4.63) as large as the mean at T2 in the control group.

## Sheet: Table D
DGL Model	Outcome = a + b1 * group
Outcome variable	Vaccination group	Time point	Estimate	95% confidence interval
				Lower	Upper
∆PPDB - ∆PPDA	Live BCG	T9	3.0167	1.7726	4.2608
	Formalin-inactivated BCG	T9	0.5667	-0.6313	1.7646
	Heat-killed M. bovis	T9	6.55	2.8999	10.2001
The estimates are the multiplication factor rates (ratios) for each time point compared to the mean value of the control group at the same time point: e.g. the estimate for the heat-killed M. bovis group at T9 is 6.55. Thus, at T9 the mean in this group is 6.55 times (95% confidence interval 2.90-10.20) as large as the mean at T9 in the control group.

## Sheet: Table E
GLM Model	Outcome = a + b1 * group
∆PC1	Live BCG	T9	0.23	-0.33	0.79
	Formalin-inactivated BCG	T9	0.53	-0.03	1.09
	Heat-killed M. bovis	T9	2.37	1.81	2.93
∆PC2	Live BCG	T9	0.45	-0.28	1.18
	Formalin-inactivated BCG	T9	-0.07	-0.8	0.67
	Heat-killed M. bovis	T9	1.08	0.35	1.82
The estimates are the multiplication factor rates (ratios) for each time point compared to the mean value of the control group at the same time point: e.g. in the model describing ∆PC1, the estimate for the heat-killed M. bovis group at T9 is 2.37. Thus, at T9 the mean in this group is 2.37 times (95% confidence interval 1.81-2.93) as large as the mean at T9 in the control group.

## Sheet: Table F
LME Model	Outcome = a + b1 * LN side + b2 * group + b3 * (LN side * group) + b4 * gender
Outcome variable	Vaccination group	LN side	Time point	Estimate	95% confidence interval
					Lower	Upper
LN weights	Live BCG	Left	T12	1.06	0.86	1.2987
		Right	T12	1.07	0.87	1.3195
	Formalin-inactivated BCG	Left	T12	0.94	0.78	1.1422
		Right	T12	0.96	0.79	1.1634
	Heat-killed M. bovis	Left	T12	1.16	0.95	1.4249
		Right	T12	1.1	0.9	1.3426
The estimates are the multiplication factor rates (ratios) for each time point compared to the mean value of the control group at the same time point: e.g. the estimate for the left LN in the heat-killed M. bovis group at T12 is 1.16. Thus, at T12 the mean in this group is 1.16 times (95% confidence interval 0.95-1.42) as large as the mean at T12 in the control group.

## Sheet: Table G
NB GL Model	Outcome = a + b1 * group
Bacterial counts	Live BCG	Right	T12	11.35	0.35	367.746
	Formalin-inactivated BCG	Right	T12	9.08	0.38	294.159
	Heat-killed M. bovis	Right	T12	0.73	0.02	23.671
The estimates are the multiplication factor rates (ratios) for each time point compared to the mean value of the control group at the same time point: e.g. the estimate for the heat-killed M. bovis group at T12 is 0.73 Thus, at T12 the mean in this group is 0.73 times (95% confidence interval 0.02-23.67) as large as (thus smaller than) the mean at T12 in the control group.
